# Supplementary material for: A targeted analysis reveals relevant shifts in the methylation and transcription of genes responsible for bile acid homeostasis and drug metabolism in non-alcoholic fatty liver disease
Source: PubMed Central journal article supplement (PMC4908840; doi:10.1186/s12864-016-2814-z), 2016-06-14
Supplement: 12864_2016_2814_MOESM5_ESM.pdf [file 12864_2016_2814_MOESM5_ESM.pdf]

**A targeted analysis reveals relevant shifts in the methylation and transcription of genes responsible for bile acid homeostasis and drug metabolism in non-alcoholic fatty liver disease**

Supplement

**Authors:** H. B. Schiöth<sup>1</sup>, A. Boström<sup>1</sup>, S. K. Murphy<sup>2</sup>, W. Erhart<sup>3</sup>, J. Hampe<sup>4</sup>, C. Moylan<sup>5,6</sup>

and J. Mwinyi<sup>1</sup>

<sup>1</sup>Department of Neuroscience, Functional Pharmacology, Uppsala University, Uppsala, Sweden

<sup>2</sup>Department of Obstetrics and Gynecology, Duke University Medical Center, Durham, North Carolina, USA

<sup>3</sup>Department of Internal Medicine I, University Hospital Schleswig-Holstein, Kiel, Germany

<sup>4</sup>Medical Department I, University Hospital Dresden, Dresden, Germany

<sup>5</sup>Department of Medicine, Duke University Medical Center, Durham, North Carolina, USA

<sup>6</sup>Department of Medicine, Durham Veterans Affairs Medical Center, Durham, North Carolina, USA

**Additional file 5: Table S5.** NAFLD dependent associations between the methylation of CpG sites belonging to genes listed in table 5 and 6 and transcripts of a maximum of 10 neighboring genes

**Table S5** NAFLD dependent associations between the methylation of CpG sites belonging to genes listed in table 5 and 6 and transcripts of a maximum of 10 neighboring genes

| No.* | Gene    | Neighboring Genes | Up/Downstream | Affymetrix ID | Robust Linear Regression Model** (n=50) |               |                 |                   | Pearson Correlation*** |               |                 |               |
|------|---------|-------------------|---------------|---------------|-----------------------------------------|---------------|-----------------|-------------------|------------------------|---------------|-----------------|---------------|
|      |         |                   |               |               | p (Expr.)                               | Coef. (Expr.) | p (Expr.*Fib)   | Coef. (Expr.*Fib) | NAFLD & NASH (n=20)    |               | Controls (n=30) |               |
|      |         |                   |               |               |                                         |               |                 |                   | p (Expr.)              | Coef. (Expr.) | p (Expr.)       | Coef. (Expr.) |
| 1.1  | CYP1A2  | <b>CYP1A1</b>     | Downstream    | 7990391       | <b>1.20E-03</b>                         | -0.18         | ns              | -                 | ns                     | -             | ns              | -             |
| 1.2  | CYP1A2  | <b>EDC3</b>       | Downstream    | 7990379       | ns                                      | -             | ns              | -                 | ns                     | -             | <b>3.94E-02</b> | 0.38          |
| 1.3  | CYP1A2  | <b>CLK3</b>       | Downstream    | 7984846       | ns                                      | -             | ns              | -                 | ns                     | -             | ns              | -             |
| 1.4  | CYP1A2  | <b>ARID3B</b>     | Downstream    | 7902592       | ns                                      | -             | ns              | -                 | ns                     | -             | ns              | -             |
| 1.5  | CYP1A2  | <b>UBL7</b>       | Downstream    | 7990361       | <b>1.16E-02</b>                         | -0.67         | ns              | -                 | ns                     | -             | ns              | -             |
| 1.6  | CYP1A2  | <b>CSK</b>        | Upstream      | 7984871       | <b>1.96E-03</b>                         | -0.83         | ns              | -                 | ns                     | -             | ns              | -             |
| 1.7  | CYP1A2  | <b>LMAN1L</b>     | Upstream      | 7984892       | ns                                      | -             | ns              | -                 | ns                     | -             | ns              | -             |
| 1.8  | CYP1A2  | <b>CPLX3</b>      | Upstream      | 7984908       | ns                                      | -             | ns              | -                 | ns                     | -             | ns              | -             |
| 1.9  | CYP1A2  | <b>ULK3</b>       | Upstream      | 7990400       | ns                                      | -             | ns              | -                 | ns                     | -             | ns              | -             |
| 1.10 | CYP1A2  | <b>SCAMP2</b>     | Upstream      | 7990417       | <b>4.78E-02</b>                         | -0.48         | ns              | -                 | ns                     | -             | ns              | -             |
| 2.1  | CYP27A1 | <b>TTL4</b>       | Downstream    | 8048411       | ns                                      | -             | ns              | -                 | ns                     | -             | ns              | -             |
| 2.2  | CYP27A1 | <b>STK36</b>      | Downstream    | 8048381       | ns                                      | -             | ns              | -                 | ns                     | -             | ns              | -             |
| 2.3  | CYP27A1 | <b>BCS1L</b>      | Downstream    | 8048370       | ns                                      | -             | ns              | -                 | ns                     | -             | <b>7.04E-03</b> | -0.48         |
| 2.4  | CYP27A1 | <b>PLCD4</b>      | Downstream    | 8048350       | ns                                      | -             | ns              | -                 | ns                     | -             | ns              | -             |
| 2.5  | CYP27A1 | <b>PRKAG3</b>     | Upstream      | 8058997       | ns                                      | -             | ns              | -                 | ns                     | -             | ns              | -             |
| 2.6  | CYP27A1 | <b>WNT6</b>       | Upstream      | 8048445       | ns                                      | -             | ns              | -                 | ns                     | -             | ns              | -             |
| 2.7  | CYP27A1 | <b>CDK5R2</b>     | Upstream      | 8048460       | <b>2.03E-02</b>                         | -0.41         | ns              | -                 | ns                     | -             | ns              | -             |
| 2.8  | CYP27A1 | <b>WNT10A</b>     | Upstream      | 8048452       | ns                                      | -             | ns              | -                 | ns                     | -             | ns              | -             |
| 3.1  | CYP2B6  | <b>CYP2A7</b>     | Downstream    | 8036981       | ns                                      | -             | ns              | -                 | ns                     | -             | ns              | -             |
| 3.2  | CYP2B6  | <b>CYP2A6</b>     | Downstream    | 8028973       | ns                                      | -             | ns              | -                 | ns                     | -             | ns              | -             |
| 3.3  | CYP2B6  | <b>EGLN2</b>      | Downstream    | 8028940       | ns                                      | -             | ns              | -                 | ns                     | -             | ns              | -             |
| 3.4  | CYP2B6  | <b>RAB4B</b>      | Downstream    | 8028930       | ns                                      | -             | ns              | -                 | <b>2.69E-02</b>        | -0.49         | ns              | -             |
| 3.5  | CYP2B6  | <b>C19orf54</b>   | Downstream    | 8036956       | ns                                      | -             | ns              | -                 | ns                     | -             | ns              | -             |
| 3.6  | CYP2B6  | <b>CYP2A13</b>    | Upstream      | 8028973       | ns                                      | -             | ns              | -                 | ns                     | -             | ns              | -             |
| 3.7  | CYP2B6  | <b>CYP2F1</b>     | Upstream      | 8028984       | ns                                      | -             | <b>5.92E-03</b> | -2.45             | ns                     | -             | ns              | -             |
| 3.8  | CYP2B6  | <b>CYP2S1</b>     | Upstream      | 8028991       | ns                                      | -             | ns              | -                 | ns                     | -             | ns              | -             |
| 3.9  | CYP2B6  | <b>AXL</b>        | Upstream      | 8029006       | ns                                      | -             | ns              | -                 | ns                     | -             | ns              | -             |
| 3.10 | CYP2B6  | <b>HNRNPUL1</b>   | Upstream      | 8029029       | ns                                      | -             | ns              | -                 | ns                     | -             | ns              | -             |
| 4.1  | CYP2C19 | <b>CYP2C18</b>    | Downstream    | 7929466       | ns                                      | -             | ns              | -                 | ns                     | -             | ns              | -             |
| 4.2  | CYP2C19 | <b>HELLS</b>      | Downstream    | 7929438       | ns                                      | -             | ns              | -                 | ns                     | -             | ns              | -             |
| 4.3  | CYP2C19 | <b>TBC1D12</b>    | Downstream    | 7929424       | ns                                      | -             | ns              | -                 | ns                     | -             | ns              | -             |
| 4.4  | CYP2C19 | <b>NOC3L</b>      | Downstream    | 7935146       | ns                                      | -             | ns              | -                 | ns                     | -             | ns              | -             |
| 4.5  | CYP2C19 | <b>PLCE1</b>      | Downstream    | 7929388       | ns                                      | -             | ns              | -                 | ns                     | -             | ns              | -             |
| 4.6  | CYP2C19 | <b>CYP2C8</b>     | Upstream      | 7935169       | ns                                      | -             | ns              | -                 | ns                     | -             | ns              | -             |
| 4.7  | CYP2C19 | <b>CYP2C9</b>     | Upstream      | 7929487       | ns                                      | -             | ns              | -                 | ns                     | -             | ns              | -             |
| 4.8  | CYP2C19 | <b>PDLIM1</b>     | Upstream      | 7935180       | ns                                      | -             | ns              | -                 | ns                     | -             | ns              | -             |
| 4.9  | CYP2C19 | <b>SORBS1</b>     | Upstream      | 7935188       | ns                                      | -             | ns              | -                 | <b>1.74E-03</b>        | 0.65          | ns              | -             |
| 4.10 | CYP2C19 | <b>ENTPD1</b>     | Upstream      | 7929511       | ns                                      | -             | ns              | -                 | <b>2.96E-02</b>        | 0.49          | ns              | -             |
| 5.1  | EPHX1   | <b>LBR</b>        | Downstream    | 7910096       | ns                                      | -             | <b>2.34E-02</b> | -2.39             | ns                     | -             | ns              | -             |
| 5.2  | EPHX1   | <b>DNAH14</b>     | Downstream    | 7910030       | ns                                      | -             | <b>8.15E-03</b> | 13.12             | ns                     | -             | ns              | -             |
| 5.3  | EPHX1   | <b>WDR26</b>      | Downstream    | 7924582       | <b>3.46E-02</b>                         | 0.42          | ns              | -                 | ns                     | -             | <b>2.61E-02</b> | 0.41          |
| 5.4  | EPHX1   | <b>PYCR2</b>      | Upstream      | 7924669       | ns                                      | -             | ns              | -                 | ns                     | -             | ns              | -             |
| 5.5  | EPHX1   | <b>TMEM63A</b>    | Upstream      | 7924636       | ns                                      | -             | ns              | -                 | ns                     | -             | ns              | -             |
| 5.6  | EPHX1   | <b>LEFTY1</b>     | Upstream      | 7924663       | <b>2.83E-02</b>                         | -0.35         | ns              | -                 | ns                     | -             | ns              | -             |
| 5.7  | EPHX1   | <b>LEFTY2</b>     | Upstream      | 7924682       | ns                                      | -             | ns              | -                 | ns                     | -             | ns              | -             |
| 6.1  | FGFR4   | <b>ZNF346</b>     | Downstream    | 8110253       | ns                                      | -             | ns              | -                 | ns                     | -             | ns              | -             |
| 6.2  | FGFR4   | <b>UIMC1</b>      | Downstream    | 8115978       | <b>3.96E-03</b>                         | 0.57          | ns              | -                 | ns                     | -             | ns              | -             |
| 6.3  | FGFR4   | <b>UNC5A</b>      | Downstream    | 8110237       | ns                                      | -             | ns              | -                 | ns                     | -             | ns              | -             |
| 6.4  | FGFR4   | <b>TSPAN17</b>    | Downstream    | 8110224       | ns                                      | -             | ns              | -                 | ns                     | -             | ns              | -             |
| 6.5  | FGFR4   | <b>EIF4E1B</b>    | Downstream    | 8110218       | ns                                      | -             | ns              | -                 | ns                     | -             | ns              | -             |
| 6.6  | FGFR4   | <b>NSD1</b>       | Upstream      | 8110289       | ns                                      | -             | ns              | -                 | ns                     | -             | ns              | -             |
| 6.7  | FGFR4   | <b>RAB24</b>      | Upstream      | 8115997       | ns                                      | -             | ns              | -                 | <b>2.29E-03</b>        | 0.64          | ns              | -             |

|       |         |          |            |         |                 |       |                 |       |                 |      |                 |       |
|-------|---------|----------|------------|---------|-----------------|-------|-----------------|-------|-----------------|------|-----------------|-------|
| 6.8   | FGFR4   | PRELID1  | Upstream   | 8110318 | <b>6.97E-03</b> | -0.28 | ns              | -     | ns              | -    | ns              | -     |
| 6.9   | FGFR4   | MXD3     | Upstream   | 8116012 | ns              | -     | ns              | -     | ns              | -    | ns              | -     |
| 6.10  | FGFR4   | LMAN2    | Upstream   | 8116020 | ns              | -     | ns              | -     | <b>2.50E-02</b> | 0.50 | ns              | -     |
| 7.1   | GSTP1   | CABP2    | Downstream | 7949843 | ns              | -     | ns              | -     | ns              | -    | ns              | -     |
| 7.2   | GSTP1   | CDK2AP2  | Downstream | 7949836 | ns              | -     | ns              | -     | ns              | -    | ns              | -     |
| 7.3   | GSTP1   | PITPNM1  | Downstream | 7949808 | ns              | -     | ns              | -     | ns              | -    | ns              | -     |
| 7.4   | GSTP1   | AIP      | Downstream | 7949863 | ns              | -     | ns              | -     | ns              | -    | ns              | -     |
| 7.5   | GSTP1   | NDUFV1   | Upstream   | 7941946 | ns              | -     | ns              | -     | ns              | -    | ns              | -     |
| 7.6   | GSTP1   | NUDT8    | Upstream   | 7949857 | <b>1.20E-04</b> | 0.42  | ns              | -     | ns              | -    | <b>2.60E-02</b> | 0.41  |
| 7.7   | GSTP1   | TBX10    | Upstream   | 7949863 | ns              | -     | ns              | -     | ns              | -    | ns              | -     |
| 9.1   | SLC10A1 | SLC39A9  | Downstream | 7975344 | ns              | -     | ns              | -     | ns              | -    | ns              | -     |
| 9.2   | SLC10A1 | ERH      | Downstream | 7979864 | ns              | -     | ns              | -     | ns              | -    | ns              | -     |
| 9.3   | SLC10A1 | SMOC1    | Upstream   | 7975390 | ns              | -     | ns              | -     | ns              | -    | ns              | -     |
| 9.4   | SLC10A1 | SLC8A3   | Upstream   | 7979888 | ns              | -     | ns              | -     | ns              | -    | ns              | -     |
| 9.5   | SLC10A1 | COX16    | Upstream   | 7979906 | ns              | -     | ns              | -     | ns              | -    | ns              | -     |
| 9.6   | SLC10A1 | ADAM21P1 | Upstream   | 7975406 | ns              | -     | ns              | -     | ns              | -    | ns              | -     |
| 9.7   | SLC10A1 | SYNJ2BP  | Upstream   | 7979916 | ns              | -     | ns              | -     | ns              | -    | ns              | -     |
| 10.1  | SLC27A5 | ZNF446   | Downstream | 8031962 | ns              | -     | ns              | -     | ns              | -    | ns              | -     |
| 10.2  | SLC27A5 | ZNF324   | Downstream | 8031956 | ns              | -     | ns              | -     | ns              | -    | ns              | -     |
| 10.3  | SLC27A5 | ZNF324B  | Downstream | 8031949 | <b>1.54E-02</b> | -0.38 | ns              | -     | ns              | -    | ns              | -     |
| 10.4  | SLC27A5 | ZNF132   | Downstream | 8039771 | ns              | -     | ns              | -     | ns              | -    | ns              | -     |
| 10.5  | SLC27A5 | ZNF584   | Downstream | 8031939 | ns              | -     | ns              | -     | ns              | -    | ns              | -     |
| 10.6  | SLC27A5 | ZBTB45   | Upstream   | 8039791 | ns              | -     | ns              | -     | ns              | -    | ns              | -     |
| 10.7  | SLC27A5 | TRIM28   | Upstream   | 8031913 | ns              | -     | ns              | -     | ns              | -    | ns              | -     |
| 10.8  | SLC27A5 | CHMP2A   | Upstream   | 8039796 | ns              | -     | ns              | -     | ns              | -    | ns              | -     |
| 10.9  | SLC27A5 | UBE2M    | Upstream   | 8001111 | ns              | -     | <b>1.21E-04</b> | -4.44 | ns              | -    | ns              | -     |
| 11.1  | SLC47A1 | RNF112   | Downstream | 8005586 | ns              | -     | ns              | -     | ns              | -    | ns              | -     |
| 11.2  | SLC47A1 | B9D1     | Downstream | 8013331 | ns              | -     | ns              | -     | ns              | -    | ns              | -     |
| 11.3  | SLC47A1 | MFAP4    | Downstream | 8013341 | ns              | -     | ns              | -     | ns              | -    | ns              | -     |
| 11.4  | SLC47A1 | MAPK7    | Downstream | 8005576 | ns              | -     | ns              | -     | ns              | -    | <b>8.21E-03</b> | -0.47 |
| 11.5  | SLC47A1 | MFAP4    | Downstream | 8013341 | ns              | -     | ns              | -     | ns              | -    | ns              | -     |
| 11.6  | SLC47A1 | ALDH3A2  | Upstream   | 8005638 | <b>5.81E-04</b> | -0.74 | ns              | -     | ns              | -    | <b>2.43E-03</b> | -0.53 |
| 11.7  | SLC47A1 | SLC47A2  | Upstream   | 8013364 | ns              | -     | ns              | -     | ns              | -    | ns              | -     |
| 11.8  | SLC47A1 | ALDH3A1  | Upstream   | 8013384 | ns              | -     | ns              | -     | ns              | -    | ns              | -     |
| 11.9  | SLC47A1 | ULK2     | Upstream   | 8013399 | ns              | -     | ns              | -     | ns              | -    | ns              | -     |
| 11.10 | SLC47A1 | AKAP10   | Upstream   | 8013431 | <b>1.05E-04</b> | 1.08  | ns              | -     | ns              | -    | ns              | -     |
| 12.1  | SLC51A  | TFRC     | Downstream | 8093053 | ns              | -     | ns              | -     | <b>3.68E-02</b> | 0.47 | <b>1.04E-02</b> | 0.46  |
| 12.2  | SLC51A  | TNK2     | Downstream | 8093013 | ns              | -     | ns              | -     | ns              | -    | ns              | -     |
| 12.3  | SLC51A  | MUC4     | Downstream | 8092978 | ns              | -     | ns              | -     | ns              | -    | ns              | -     |
| 12.4  | SLC51A  | MUC20    | Downstream | 8084895 | ns              | -     | ns              | -     | ns              | -    | ns              | -     |
| 12.5  | SLC51A  | PCYT1A   | Upstream   | 8093086 | ns              | -     | ns              | -     | ns              | -    | ns              | -     |
| 12.6  | SLC51A  | CTEX1D2  | Upstream   | 8093096 | ns              | -     | ns              | -     | ns              | -    | ns              | -     |
| 12.7  | SLC51A  | TM4SF19  | Upstream   | 8093104 | ns              | -     | ns              | -     | ns              | -    | ns              | -     |
| 12.8  | SLC51A  | RNF168   | Upstream   | 8093130 | ns              | -     | ns              | -     | ns              | -    | ns              | -     |
| 13.1  | SLCO2B1 | NEU3     | Downstream | 7942562 | ns              | -     | ns              | -     | ns              | -    | ns              | -     |
| 13.2  | SLCO2B1 | SPCS2    | Downstream | 7914180 | ns              | -     | ns              | -     | ns              | -    | ns              | -     |
| 13.3  | SLCO2B1 | XRRA1    | Downstream | 7942544 | ns              | -     | ns              | -     | ns              | -    | ns              | -     |
| 13.4  | SLCO2B1 | RNF169   | Downstream | 7942544 | ns              | -     | ns              | -     | ns              | -    | ns              | -     |
| 13.5  | SLCO2B1 | CHRDL2   | Downstream | 7950425 | ns              | -     | <b>3.35E-06</b> | 7.11  | ns              | -    | ns              | -     |
| 13.6  | SLCO2B1 | RPS3     | Upstream   | 7896740 | ns              | -     | ns              | -     | ns              | -    | ns              | -     |
| 13.7  | SLCO2B1 | KLHL35   | Upstream   | 7950492 | ns              | -     | ns              | -     | ns              | -    | ns              | -     |
| 13.8  | SLCO2B1 | GDPD5    | Upstream   | 7950501 | ns              | -     | <b>6.13E-06</b> | -3.79 | ns              | -    | ns              | -     |
| 13.9  | SLCO2B1 | SERPINH1 | Upstream   | 7942596 | ns              | -     | ns              | -     | ns              | -    | ns              | -     |
| 14.1  | SULT1A1 | SULT1A2  | Downstream | 8000582 | <b>1.80E-06</b> | -0.30 | <b>3.67E-04</b> | -1.39 | ns              | -    | <b>7.02E-04</b> | -0.58 |
| 14.2  | SULT1A1 | NUPR1    | Downstream | 8000574 | ns              | -     | ns              | -     | ns              | -    | <b>3.24E-03</b> | -0.52 |
| 14.3  | SULT1A1 | IL27     | Downstream | 8000567 | ns              | -     | ns              | -     | ns              | -    | <b>4.98E-02</b> | -0.36 |
| 14.4  | SULT1A1 | CLN3     | Downstream | 8000543 | <b>1.46E-02</b> | -0.83 | ns              | -     | ns              | -    | <b>3.56E-04</b> | -0.61 |
| 14.5  | SULT1A1 | EIF3C    | Upstream   | 7994415 | ns              | -     | ns              | -     | ns              | -    | ns              | -     |
| 14.6  | SULT1A1 | ATXN2L   | Upstream   | 7994386 | ns              | -     | ns              | -     | ns              | -    | ns              | -     |
| 14.7  | SULT1A1 | TUFM     | Upstream   | 8000603 | ns              | -     | ns              | -     | ns              | -    | ns              | -     |

Shown are genes that showed NAFLD dependent methylation transcription associations as listed in table 5 and 6 (alphabetical order). The expression of up to five upstream and 5 downstream located genes (if available and measured by the affymetrix array) was linearly regressed to the average methylation changes of the CpG sites associated to the key genes listed in column 2.

\* The number allocates a running number to the key gene investigated and listed in table 5 followed by a running number for the neighbouring gene investigated here with regard to associations between methylation and transcriptional expression.

\*\*Regression analyses studying the association between average methylation in the TSS1500 interval of the gene listed in column 2 and transcription of the neighbouring genes listed in column 3 in the EC cohort. Analyses are taking the strength of fibrosis into account either as independent covariate (column 6 and 7) or as interaction term that combines fibrosis and expression (column 8 and 9).

\*\*\*Pearson`s correlation analyses correlating average methylation state in the TSS1500 interval and strength of transcription in NAFLD and non-NAFLD patients of the EC cohort

-, no coefficient given for non significant results;No, number; ns, not significant; coef, coefficient; ID, identification number
